# Supplementary material for: Characterization of the Molecular Events Underlying the Establishment of Axillary Meristem Region in Pepper
Source: MDPI journal article supplement (doi:10.3390/ijms241612718), 2023-08-12
Supplement: s1 [file s1]

## Supplementary materials

Table S2 Summary of RNA sequencing and assembly

| Samples | Obtained Reads | Obtained Base(bp) | Q30(%) | GC(%) |
|---------|----------------|-------------------|--------|-------|
| A1-1    | 22,304,832     | 6,674,142,204     | 94.05  | 43.05 |
| A1-2    | 26,023,912     | 7,788,307,930     | 93.94  | 43.09 |
| A1-3    | 22,823,203     | 6,830,831,808     | 93.7   | 43.16 |
| A-2-1   | 23,668,282     | 7,083,093,858     | 94.23  | 43.11 |
| A-2-2   | 22,031,770     | 6,593,950,342     | 93.65  | 43.1  |
| A-2-3   | 22,539,220     | 6,743,956,116     | 94.07  | 43.09 |
| A-3-1   | 20,510,645     | 6,139,776,564     | 93.17  | 42.95 |
| A-3-2   | 22,429,753     | 6,711,745,054     | 93.17  | 42.97 |
| A-3-3   | 22,770,448     | 6,806,687,212     | 93.41  | 43.05 |
| B-1-1   | 23,110,379     | 6,915,045,410     | 94.11  | 44.07 |
| B-1-2   | 21,235,798     | 6,355,300,496     | 94.13  | 44.07 |
| B-1-3   | 20,858,612     | 6,242,490,374     | 94.06  | 44.28 |
| B-2-1   | 19,756,888     | 5,912,551,984     | 93.72  | 44.1  |
| B-2-2   | 20,837,014     | 6,235,898,274     | 94.28  | 44.07 |
| B-2-3   | 22,786,667     | 6,819,108,570     | 94.19  | 43.99 |
| B-3-1   | 19,300,909     | 5,776,282,088     | 93.6   | 43.67 |
| B-3-2   | 19,988,758     | 5,977,828,252     | 93.51  | 43.99 |
| B-3-3   | 20,321,939     | 6,078,738,230     | 94.03  | 44.12 |
| C-1-1   | 20,277,503     | 6,064,779,048     | 91.12  | 42.67 |
| C-1-2   | 19,961,269     | 5,970,335,780     | 90.90  | 43.10 |
| C-1-3   | 23,149,176     | 6,926,575,290     | 92.89  | 44.39 |
| C-2-1   | 20,574,635     | 6,157,927,870     | 94.12  | 43.87 |
| C-2-2   | 25,959,397     | 7,768,225,360     | 94.07  | 43.92 |
| C-2-3   | 19,882,232     | 5,950,499,140     | 93.74  | 43.92 |
| C-3-1   | 19,648,251     | 5,878,764,034     | 93.76  | 43.95 |
| C-3-2   | 20,399,873     | 6,104,784,178     | 93.15  | 43.87 |
| C-3-3   | 20,067,188     | 6,004,192,140     | 93.43  | 43.8  |
